# Supplementary material for: First-principles calculations of the electronic structure and bonding in metal cluster–fullerene materials considered within the superatomic framework
Source: Royal Society of Chemistry journal article supplement (doi:10.1039/c6cp04486g), 2016-01-01
Supplement: c6cp04486g1.pdf [file c6cp04486g1.pdf]

Supporting information for:  
First-principles calculations of the electronic  
structure and bonding in metal  
cluster-fullerene materials considered within  
the superatomic framework

Lukas Hammerschmidt,<sup>\*,†</sup> Julia Schacht,<sup>‡</sup> and Nicola Gaston<sup>†</sup>

*†The MacDiarmid Institute for Advanced Materials and Nanotechnology, Department of  
Physics, The University of Auckland, Private Bag 92019, Auckland, New Zealand*

*‡School of Chemical and Physical Sciences, Victoria University of Wellington, Wellington  
6140, New Zealand*

E-mail: l.hammerschmidt@auckland.ac.nz

Phone: +64 3737 999 x 84427

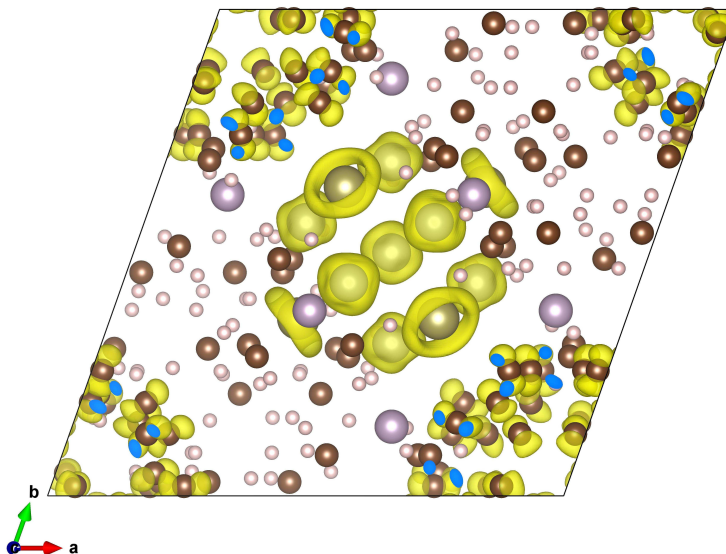

Figure S1: Band decomposed charge density for one of the three highest occupied bands in  $[\text{Ni}_9\text{Te}_6(\text{PEt}_3)_8]\text{C}_{60}$ .

As described in the main article, Figs. S2-S4 show the angular momentum-projected DOS for spherical harmonic functions centered at the cluster center for the transition metal clusters, in both the bulk compound and for the free clusters. The electronic structure of free clusters were calculated for charges that range from 0 to 2. Figs. S2-S4 reveal that angular momentum-projected DOS for the free clusters show strong similarities, whenever the applied charge in the cluster is closest to the charge observed in the compound by a Bader analysis.

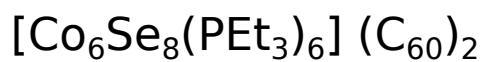

LDA:

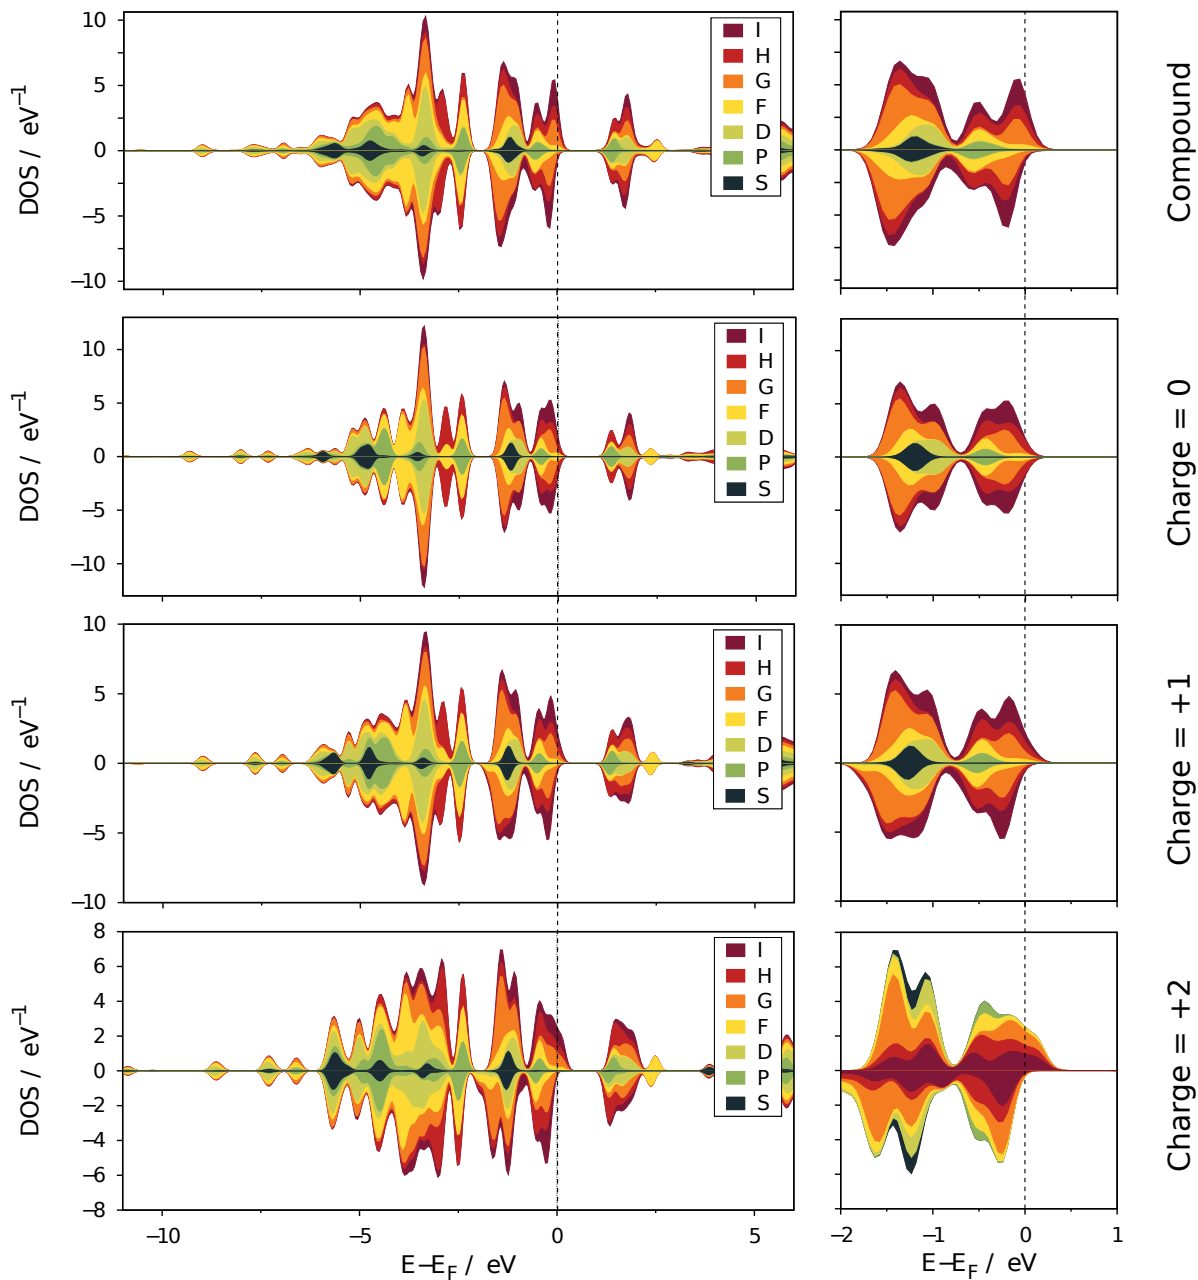

Figure S2: Superatomic character for the compound  $[\text{Co}_6\text{Se}_8(\text{PEt}_3)_6][\text{C}_{60}]_2$  and its corresponding ligand-protected metal clusters for charges  $q = 0, 1, 2$ . Contributions to the projected DOS are shown in a stacked view, such that the height of the DOS represents the total DOS.

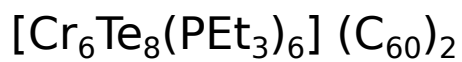

LDA:

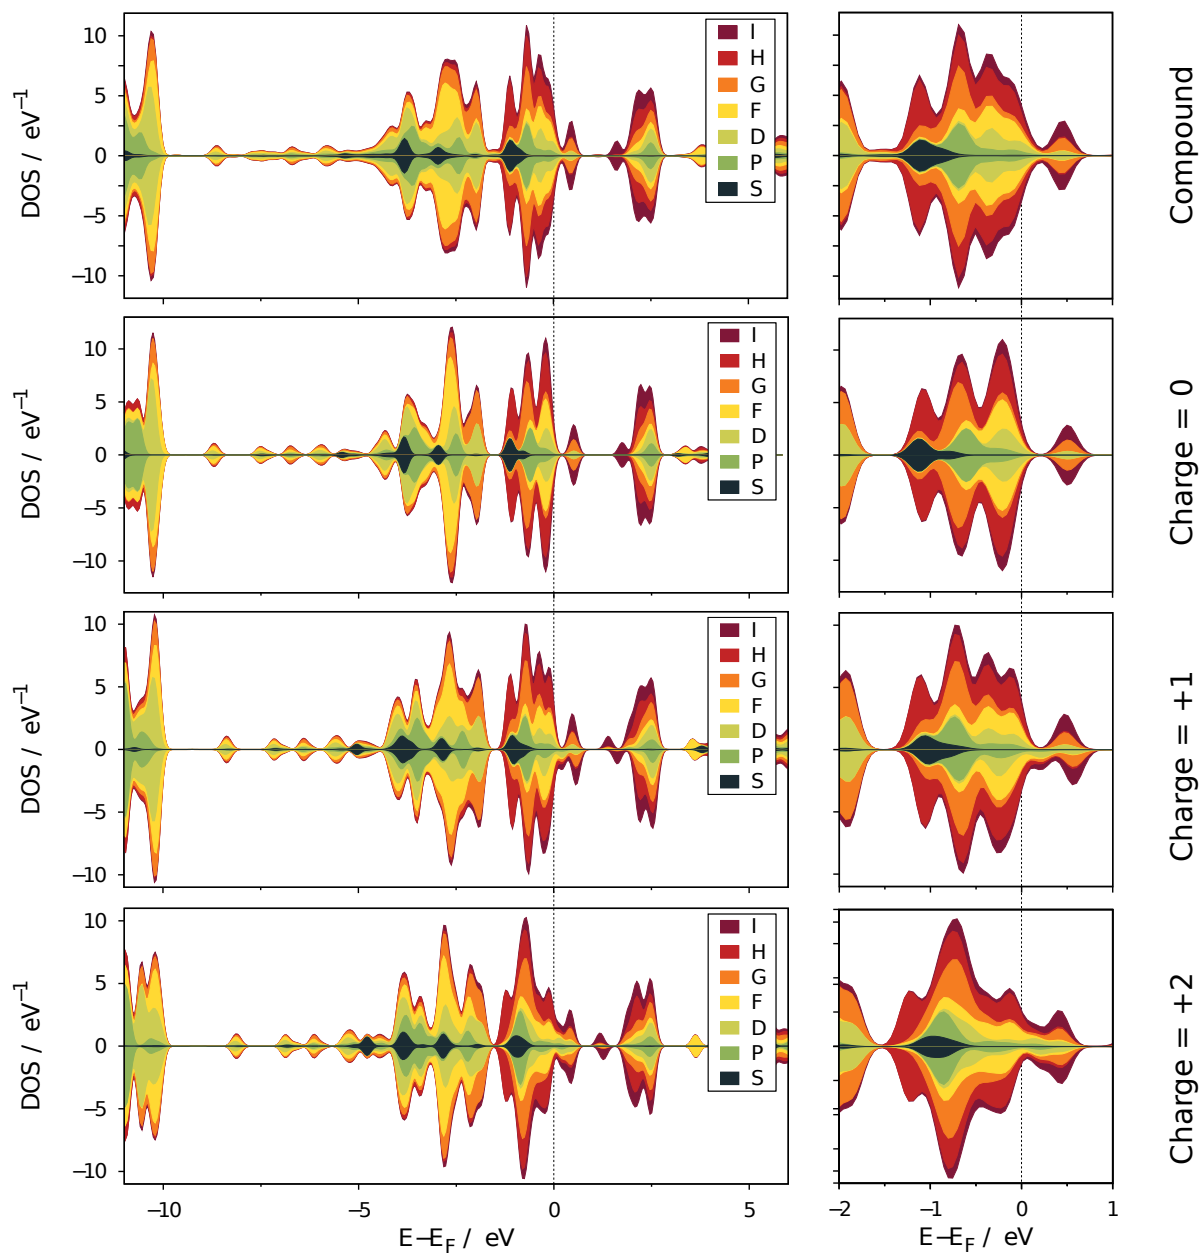

Figure S3: Superatomic character for the compound  $[\text{Cr}_6\text{Te}_8(\text{PEt}_3)_6][\text{C}_{60}]_2$  and its corresponding ligand-protected metal clusters for charges  $q = 0, 1, 2$ . Contributions to the projected DOS are shown in a stacked view, such that the height of the DOS represents the total DOS.

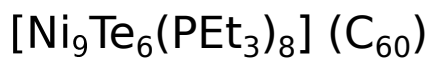

LDA:

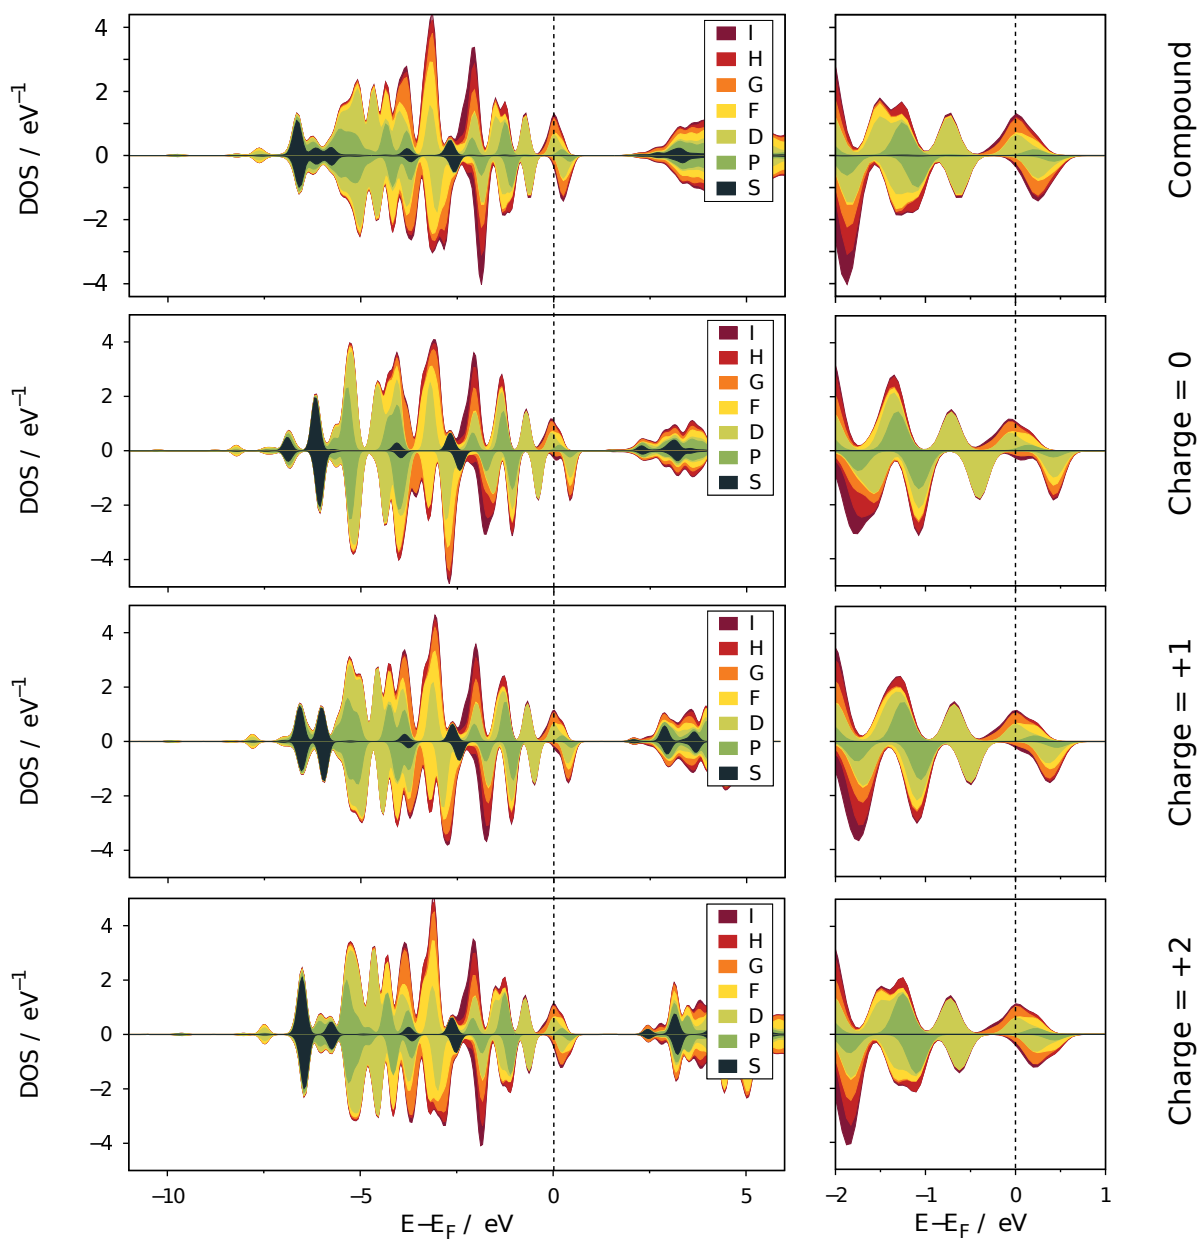

Figure S4: Superatomic character for the compound  $[\text{Ni}_9\text{Te}_6(\text{PEt}_3)_8]\text{C}_{60}$  and its corresponding ligand-protected metal clusters for charges  $q = 0, 1, 2$ . Contributions to the projected DOS are shown in a stacked view, such that the height of the DOS represents the total DOS.
